# Supplementary material for: Prevalence and clinical characteristics of patients with rheumatoid arthritis with interstitial lung disease using unstructured healthcare data and machine learning
Source: PubMed Central journal article supplement — RMD Open. 2024 Jan 30;10(1):e003353. doi: 10.1136/rmdopen-2023-003353 (PMC10836356; doi:10.1136/rmdopen-2023-003353), 2024-01-30
Supplement: rmdopen-2023-003353supp001.pdf [file rmdopen-2023-003353supp001.pdf]

## Resumen

### Objetivos

Los datos del mundo real sobre la artritis reumatoide (AR) y su asociación con la enfermedad pulmonar intersticial (EPI) aún son escasos. El objetivo de este estudio fue estimar la prevalencia de AR y EPI en pacientes con AR (AR-EPI) en España, y comparar las características clínicas de los pacientes con AR con y sin EPI mediante machine learning y procesamiento del lenguaje natural (PLN) en las historias clínicas electrónicas (HCE).

### Métodos

Estudio observacional de casos y controles, retrospectivo y multicéntrico basado en el uso secundario de datos clínicos no estructurados de pacientes adultos con AR y AR-EPI de 9 hospitales entre 2014 y 2019. Se utilizó la PLN para extraer información clínica no estructurada de la HCE y estandarizarla en una terminología SNOMED-CT. Se calculó la prevalencia de AR y RAILD y se realizó un análisis descriptivo. Se compararon las características entre los pacientes con AR-EPI y AR sin EPI.

### Resultados

De una población fuente de 3.176.165 pacientes y 64.241.683 HCE, se identificaron 13.958 pacientes con AR (5,1% con AR-EPI). La prevalencia global ajustada por edad de AR y AR-EPI fue de 0,53% y 0,02%, respectivamente. El subtipo de EPI más frecuente fue la neumonía intersticial usual (29,3%). Al comparar los pacientes con AR-EPI frente a los pacientes con AR sin EPI, los pacientes con AR-EPI eran de mayor edad y tenían más comorbilidades, sobre todo infecciones (33,6% vs 16,5%,  $p<0,001$ ), neoplasias malignas (15,9% vs 8,5%,  $p<0,001$ ) y enfermedades cardiovasculares (25,8% vs 13,9%,  $p<0,001$ ) en comparación a las AR sin EPI. Los pacientes con AR-EPI también presentaron una mayor carga inflamatoria reflejada en más prescripciones de inmunomoduladores y mayores parámetros inflamatorios. Además, presentaron una mayor mortalidad intrahospitalaria con mayor riesgo de muerte (HR 2,32; IC 95% 1,59 - 2,81,  $p<0,001$ ).

### Conclusiones

Encontramos una prevalencia ajustada por edad de AR y AR-EPI mediante el análisis de datos del mundo real a través de la PLN. Los pacientes con RAILD eran más vulnerables en el momento de la inclusión, con mayor comorbilidad y carga inflamatoria que los pacientes con RAILD, lo que se correlacionó con una mayor mortalidad.
