# Supplementary material for: Prevalence and clinical characteristics of patients with rheumatoid arthritis with interstitial lung disease using unstructured healthcare data and machine learning
Source: PubMed Central journal article supplement — RMD Open. 2024 Jan 30;10(1):e003353. doi: 10.1136/rmdopen-2023-003353 (PMC10836356; doi:10.1136/rmdopen-2023-003353), 2024-01-30
Supplement: rmdopen-2023-003353supp002.pdf [file rmdopen-2023-003353supp002.pdf]

## Supplementary materials

**Supplementary Text 1. Prevalence estimation**

**Supplementary Table 1. List of terminology used.**

**Supplementary Table 2. Performance of EHRead® identifying records that contain key study variables.**

**Supplementary Table 3. Population's EHRs ascertainment and data pattern assessment**

**Supplementary Table 4. Crude prevalence by sex and age of RA and RA-ILD**

**Supplementary Table 5. Age-adjusted prevalence by gender and age of RA and RA-ILD**

**Supplementary Table 6. Chest High Resolution Computerized Tomography pattern of ILD at the time of inclusion**

**Supplementary Table 7. Frequency of comorbidities at the time of inclusion**

**Supplementary Table 8. Blood tests at the time of inclusion**

**Supplementary Table 9. Sensitivity analysis with RA-support population**

**Supplementary Table 10. Supplementary analysis in patients treated with DMARDs or glucocorticoids**

**Supplementary Table 11. Healthcare Resource Utilization during follow-up**

### Supplementary Text 1. Prevalence estimation

Prevalence was calculated as follows:

- **Crude prevalence.** Calculated according to the formula:

$$\text{Prevalence} = \frac{\text{Total number of patients diagnosed with RA in the study period} *}{\text{Total number of patients at risk in the areas covered by the hospital sites} **}$$

- **Age/sex-adjusted prevalence.** Calculated by estimating the crude prevalence by sex and age (age groups spanning 10 years). These estimations were weighted according to the distribution of the population in Spain. Final adjusted estimates were obtained by adding all weighted estimations in the interest age groups (i.e., 18-29, 30-44, 45-59, 60-74, and 75+ years of age).

\*The total number of patients diagnosed with RAILD in the study period was defined as the sum of all patients with at least one mention of RA and ILD in the EHRs available within the study period (FAS).

\*\*The total number of people at risk was obtained using the databases detailed below:

- *Spatial databases*, including geographical areas covered by the participating hospital sites and Spanish census databases; the latter contain information regarding the total population in each area in 2011. These databases make possible to identify the population belonging to the care area of each hospital.
- *Temporal databases*, which contain the distribution of the population by sex and age between 1970 and 2021 for each Spanish province, which make possible to extrapolate the population to the specific time of our study.

**Supplementary Table 1. List of terminology used.**

| <b>Term name</b>                      | <b>SNOMED ID*</b>  |
|---------------------------------------|--------------------|
| Abatacept                             | 421412005          |
| Substance abuse                       | 415658005          |
| ACE inhibitors                        | 678506343435815000 |
| Acute interstitial pneumonia          | 236302005          |
| Acute myocardial infarction           | 57054005           |
| Adalimumab                            | 398728003          |
| Alanine Aminotransferase              | 33                 |
| Albumin                               | 27                 |
| Alcohol consumption                   | 219006             |
| Anemia                                | 271737000          |
| Anti-carbamylated protein antibodies  | 50127              |
| Anti-citrullinated protein antibodies | 257                |
| Antidepressants                       | 663127017671042000 |
| Anti-inflammatories                   | 687455536609505000 |
| Antiplatelet agents                   | 895808641729358000 |
| Anxiolytics                           | 866579482144794000 |
| Aspartate Aminotransferase            | 34                 |
| Asthma                                | 195967001          |
| Atrial fibrillation                   | 49436004           |
| Azathioprine                          | 111165009          |
| Baricitinib                           | 70034              |
| Beta-blockers                         | 904597696138226000 |
| Body mass index                       | 226                |
| Bone erosion                          | 50129              |
| Bone fracture                         | 125605004          |
| Calcium antagonists                   | 883947310140411000 |
| Cardiovascular disease                | 49601007           |
| Certolizumab pegol                    | 430307008          |
| Chest X-ray                           | 399208008          |
| Cholesterol                           | 84698008           |
| Chronic Obstructive Pulmonary Disease | 13645005           |
| Clinical Disease Activity Index       | 50132              |
| Combined emphysema-fibrosis syndrome  | 94894              |
| Corticosteroids                       | 79440004           |
| C-reactive protein                    | 48                 |
| Crohn's disease                       | 34000006           |
| Cryptogenic organizing pneumonia      | 68409003, 4047     |
| Cyclophosphamide                      | 74470007           |
| Depression                            | 35489007           |

|                                                           |                                         |
|-----------------------------------------------------------|-----------------------------------------|
| <b>Desquamative interstitial pneumonia</b>                | 8549006                                 |
| <b>Diabetes mellitus</b>                                  | 73211009                                |
| <b>Diffusing Capacity of the Lung for Carbon Monoxide</b> | 3609, 124                               |
| <b>Disease Activity Score 28</b>                          | 50130                                   |
| <b>Diuretics</b>                                          | 543324962549680000                      |
| <b>Dry crackles</b>                                       | 48409008                                |
| <b>Dyslipidemia</b>                                       | 370992007                               |
| <b>Erythrocyte sedimentation rate</b>                     | 8                                       |
| <b>Etanercept</b>                                         | 118259007                               |
| <b>Ex-drinker</b>                                         | 82581004                                |
| <b>Ex-smoker</b>                                          | 8392000                                 |
| <b>Ex-substance abuse</b>                                 | 105550004,1073,3295,416479009, 44870007 |
| <b>Factor Xa inhibitors</b>                               | 978329880435347000                      |
| <b>Fatty liver</b>                                        | 197321007                               |
| <b>Filgotinib</b>                                         | 10014                                   |
| <b>Flare-up</b>                                           | 201791009                               |
| <b>Forced vital capacity</b>                              | 366151006, 122                          |
| <b>Gamma-glutamyl transferase</b>                         | 35                                      |
| <b>Glomerular filtration rate (GFR)</b>                   | 81                                      |
| <b>Glucose</b>                                            | 67079006                                |
| <b>Golimumab</b>                                          | 442318002                               |
| <b>Gout</b>                                               | 90560007                                |
| <b>HbA1c (Glycated hemoglobin)</b>                        | 61                                      |
| <b>HDL cholesterol</b>                                    | 23                                      |
| <b>Heart failure</b>                                      | 84114007                                |
| <b>Height</b>                                             | 246                                     |
| <b>Hemoglobin</b>                                         | 1                                       |
| <b>High-resolution computed tomography of the lung</b>    | 241541005                               |
| <b>Hypertension</b>                                       | 38341003                                |
| <b>Hypertransaminasemia</b>                               | 99                                      |
| <b>Hyperuricemia</b>                                      | 35885006                                |
| <b>Hypolipidemic</b>                                      | 856752805180429000                      |
| <b>Idiopathic inflammatory myopathies</b>                 | 1473                                    |
| <b>Infections</b>                                         | 40733004                                |
| <b>Inflammatory bowel disease</b>                         | 24526004                                |
| <b>Infliximab</b>                                         | 108675009                               |
| <b>In-hospital mortality</b>                              | 99999000563101, 599                     |
| <b>Interstitial lung disease</b>                          | 233703007                               |
| <b>Interstitial pneumonia</b>                             | 64667001                                |
| <b>Interstitial pneumonia with autoimmune features</b>    | 870573008                               |
| <b>Kidney failure</b>                                     | 236423003, 314983004                    |

|                                                                     |                                                       |
|---------------------------------------------------------------------|-------------------------------------------------------|
| Latent tuberculosis infection                                       | 11999007                                              |
| LDL cholesterol                                                     | 24                                                    |
| Leflunomide                                                         | 109143003                                             |
| Lung biopsy                                                         | 78603008                                              |
| Lung ultrasound                                                     | 88628008                                              |
| Lymphocytes                                                         | 11                                                    |
| Lymphocytic interstitial pneumonia                                  | 44274007                                              |
| Malignancy                                                          | 363346000                                             |
| Metabolic syndrome                                                  | 237602007                                             |
| Methotrexate                                                        | 68887009                                              |
| Mixed connective tissue disease                                     | 3933                                                  |
| MMRC (Modified Medical Research Council dyspnea scale)              | 391120009,391123006,391124000,<br>391125004,391126003 |
| Mycophenolate                                                       | 109131004                                             |
| Neutrophils                                                         | 10                                                    |
| Nintedanib                                                          | 712494002                                             |
| No substance abuse                                                  | 1                                                     |
| Non-drinker                                                         | 105542008                                             |
| Non-smoker                                                          | 8517006                                               |
| Nonspecific interstitial pneumonia                                  | 129452008                                             |
| Non-Steroidal Anti-Inflammatory Drugs                               | 109506597124226000                                    |
| Obesity                                                             | 414916001                                             |
| Obliterative bronchiolitis                                          | 40100001                                              |
| Oral antidiabetics                                                  | 791432907517847000                                    |
| Oral contraceptives                                                 | 59261009                                              |
| Osteoporosis                                                        | 64859006                                              |
| Other lung diseases                                                 | 19829001                                              |
| Pirfenidone                                                         | 439581000                                             |
| Platelets                                                           | 15                                                    |
| Psoriasis                                                           | 9014002                                               |
| Psychiatric pathology                                               | 74732009                                              |
| Pulmonary fibrosis                                                  | 51615001                                              |
| RAILD                                                               | 10713006                                              |
| RAPID3 (Routine Assessment of Patient Index Data 3)                 | 50133                                                 |
| Reactive arthritis                                                  | 239783001                                             |
| Respiratory bronchiolitis                                           | 4048                                                  |
| Respiratory bronchiolitis associated with interstitial lung disease | 4050                                                  |
| Respiratory bronchiolitis associated with rheumatoid arthritis      | 4049                                                  |
| Rheumatoid arthritis                                                | 69896004                                              |
| Rheumatoid factor                                                   | 247                                                   |

|                                                 |                    |
|-------------------------------------------------|--------------------|
| <b>Rheumatoid factor negative</b>               | 165840002          |
| <b>Rheumatoid factor positive</b>               | 165839004          |
| <b>Rheumatoid nodule</b>                        | 50782009           |
| <b>Rituximab</b>                                | 108809004          |
| <b>Sarilumab</b>                                | 70024              |
| <b>SDAI (Simplified Disease Activity Index)</b> | 50131              |
| <b>Serum creatinine</b>                         | 19                 |
| <b>Severe infections</b>                        | 91302008           |
| <b>Shared epitope</b>                           | 50128              |
| <b>Sjogren's syndrome</b>                       | 83901003           |
| <b>Smoker</b>                                   | 77176002           |
| <b>Sulfasalazine</b>                            | 45844004           |
| <b>Systemic lupus erythematosus</b>             | 55464009           |
| <b>Systemic sclerosis</b>                       | 299276009          |
| <b>Tocilizumab</b>                              | 444649004          |
| <b>Tofacitinib</b>                              | 70054              |
| <b>Total bilirubin</b>                          | 25                 |
| <b>Transient ischemic attack</b>                | 266257000          |
| <b>Triglycerides</b>                            | 21                 |
| <b>Ulcerative colitis</b>                       | 64766004           |
| <b>Upadacitinib</b>                             | 10015              |
| <b>Usual interstitial pneumonia</b>             | 33172              |
| <b>Uveitis</b>                                  | 128473001          |
| <b>Vitamin K antagonists</b>                    | 780908461421528000 |
| <b>Weight</b>                                   | 259                |
| <b>White blood cell count</b>                   | 9                  |

*\*SNOMED IDs Included terminology related terms of an inferior hierarchy in SNOMED classification. New IDs were created for laboratory and other measurable parameters.*

**Supplementary Table 2. Performance of EHRead® identifying records that contain key study variables.**

| <b>Variable</b>                       | <b>Precision</b> |
|---------------------------------------|------------------|
| Bronchiolitis obliterans              | 0.917            |
| Cryptogenic organizing pneumonia      | 0.784            |
| Abatacept                             | 0.771            |
| Usual interstitial pneumonia          | 0.856            |
| Rheumatoid arthritis                  | 0.764            |
| Anti-citrullinated protein antibodies | 0.493            |
| Rheumatoid factor                     | 0.594            |
| Nonspecific interstitial pneumonia    | 0.717            |
| Desquamative interstitial pneumonia   | 0.750            |
| Interstitial lung disease             | 0.794            |
| Nintedanib                            | 0.778            |

*Precision = True Positives / (True Positives + False Positives).*

**Supplementary Table 3. Population's EHRs ascertainment and data pattern assessment.**

|                                      | <b>RA<br/>(13958)</b> | <b>RAILD<br/>(712)</b> | <b>RAnonILD<br/>(13246)</b> |
|--------------------------------------|-----------------------|------------------------|-----------------------------|
| <b>RA (support subset) n (%)</b>     | 12538 (89.8)          | 696 (97.8)             | 11842 (89.4)                |
| Multiple RA mentions n (%)           | 10909 (78.2)          | 595 (83.6)             | 10314 (77.9)                |
| RA treatments* n (%)                 | 10315 (73.9)          | 651 (91.4)             | 9664 (73)                   |
| Positive RF, ACPA or DAI** n (%)     | 3979 (28.5)           | 247 (34.7)             | 3732 (28.2)                 |
| <b>Multiple ILD mentions n (%)</b>   | 546 (3.9)             | 546 (76.7)             | 0 (0)                       |
| <b>Follow-up time (months)</b>       |                       |                        |                             |
| N (%)                                | 13958 (100)           | 712 (100)              | 13246 (100)                 |
| Mean (SD)                            | 19.1 (18.1)           | 25.2 (18.8)#           | 18.8 (18)                   |
| Median (Q1, Q3)                      | 13.3 (3.8, 31)        | 22.7 (7.8, 41.4)       | 12.9 (3.5, 30.3)            |
| <b>Look-back time (months)</b>       |                       |                        |                             |
| N (%)                                | 13958 (100)           | 712 (100)              | 13246 (100)                 |
| Mean (SD)                            | 26.6 (30.3)           | 21.8 (27.5)#           | 26.8 (30.4)                 |
| Median (Q1, Q3)                      | 17.6 (0, 46.2)        | 14.1 (0, 37.3)         | 17.9 (0, 46.6)              |
| <b>Number of EHRs/year</b>           |                       |                        |                             |
| N (%)                                | 13207 (94.6)          | 702 (98.6)             | 12505 (94.4)                |
| Mean (SD)                            | 34.1 (154.5)          | 42.9 (122.2)#          | 33.6 (156.1)                |
| Median (Q1, Q3)                      | 7.8 (3.5, 17.5)       | 15.1 (6.8, 36.4)       | 7.5 (3.5, 16.6)             |
| <b>Number of follow-up EHRs/year</b> |                       |                        |                             |
| N (%)                                | 12290 (88)            | 691 (97.1)             | 11599 (87.6)                |
| Mean (SD)                            | 42.6 (172.6)          | 62 (179.8)#            | 41.5 (172.1)                |
| Median (Q1, Q3)                      | 8.2 (3.8, 19.2)       | 15.1 (7.1, 41.1)       | 8 (3.7, 18.3)               |
| <b>Number of look-back EHRs/year</b> |                       |                        |                             |
| N (%)                                | 10051 (72)            | 507 (71.2)             | 9544 (72.1)                 |
| Mean (SD)                            | 46.1 (270.9)          | 65.4 (269.7)#          | 45.1 (270.9)                |
| Median (Q1, Q3)                      | 7.7 (3.4, 17.9)       | 13.4 (6, 36.3)         | 7.5 (3.3, 17.3)             |

DAI: Disease activity index; ILD: Interstitial lung disease; EHR: electronic health record; RA: Rheumatoid arthritis. The occurrence count of each feature was analyzed and divided by follow-up years. (#) Median (Q1, Q3) is preferred over mean (SD) for interpretation as the feature is non-normal. \*RA treatments refer to disease modifying anti-rheumatic drugs and glucocorticoids. \*\*Refer to DAS28, SDAI or CDAI.



**Supplementary Table 4. Crude prevalence by sex and age of RA and RAILD**

| Age   | Prevalence of RA, % (CI) |                   |                   | Prevalence of RAILD, % (CI) |                   |                   |
|-------|--------------------------|-------------------|-------------------|-----------------------------|-------------------|-------------------|
|       | Overall                  | Male              | Female            | Overall                     | Male              | Female            |
| All   | 0.60 (0.27; 0.92)        | 0.33 (0.13; 0.53) | 0.83 (0.40; 1.26) | 0.03 (0.02; 0.03)           | 0.02 (0.02; 0.03) | 0.03 (0.03; 0.04) |
| 18-29 | 0.18 (0.07; 0.29)        | 0.11 (0.02; 0.20) | 0.24 (0.11; 0.37) | 0.00 (0.00; 0.00)           | 0.00 (0.00; 0.00) | 0.00 (0.00; 0.00) |
| 30-44 | 0.31 (0.09; 0.52)        | 0.12 (0.02; 0.22) | 0.48 (0.16; 0.80) | 0.01 (0.01; 0.01)           | 0.00 (0.00; 0.00) | 0.01 (0.01; 0.01) |
| 45-59 | 0.53 (0.26; 0.79)        | 0.26 (0.11; 0.41) | 0.78 (0.40; 1.16) | 0.02 (0.02; 0.02)           | 0.02 (0.01; 0.02) | 0.02 (0.02; 0.03) |
| 60-74 | 0.90 (0.47; 1.33)        | 0.57 (0.26; 0.88) | 1.19 (0.67; 1.7)  | 0.06 (0.05; 0.07)           | 0.05 (0.04; 0.06) | 0.07 (0.06; 0.07) |
| >75   | 1.27 (0.62; 1.91)        | 0.89 (0.43; 1.35) | 1.50 (0.74; 2.27) | 0.07 (0.05; 0.10)           | 0.07 (0.0; 0.09)  | 0.07 (0.05; 0.10) |

CI: Confident interval; ILD: Interstitial lung disease; RA: Rheumatoid arthritis.

**Supplementary Table 5. Age-adjusted prevalence by sex and age of RA and RAILD**

| Age   | Prevalence of RA, % (CI) |                   |                   | Prevalence of RAILD, % (CI) |                   |                   |
|-------|--------------------------|-------------------|-------------------|-----------------------------|-------------------|-------------------|
|       | Overall                  | Male              | Female            | Overall                     | Male              | Female            |
| All   | 0.53 (0.24; 0.81)        | 0.28 (0.11; 0.45) | 0.75 (0.36; 1.14) | 0.02 (0.02; 0.03)           | 0.02 (0.01; 0.02) | 0.03 (0.03; 0.03) |
| 18-29 | 0.03 (0.01; 0.05)        | 0.02 (0.01; 0.04) | 0.04 (0.02; 0.07) | 0.00 (0.00; 0.00)           | 0.00 (0.00; 0.00) | 0.00 (0.00; 0.00) |
| 30-44 | 0.10 (0.03; 0.17)        | 0.04 (0.01; 0.07) | 0.15 (0.05; 0.24) | 0.00 (0.00; 0.00)           | 0.00 (0.00; 0.00) | 0.00 (0.00; 0.00) |
| 45-59 | 0.12 (0.06; 0.18)        | 0.06 (0.02; 0.10) | 0.18 (0.09; 0.26) | 0.00 (0.00; 0.01)           | 0.00 (0.00; 0.01) | 0.01 (0.01; 0.01) |
| 60-74 | 0.15 (0.08; 0.22)        | 0.09 (0.04; 0.14) | 0.20 (0.11; 0.29) | 0.01 (0.01; 0.01)           | 0.01 (0.01; 0.01) | 0.01 (0.01; 0.01) |
| >75   | 0.12 (0.06; 0.19)        | 0.07 (0.03; 0.11) | 0.18 (0.09; 0.28) | 0.01 (0.01; 0.01)           | 0.01 (0.00; 0.01) | 0.01 (0.01; 0.01) |

CI: Confident interval; ILD: Interstitial lung disease; RA: Rheumatoid arthritis.

**Supplementary Table 6. Chest High Resolution Computerized Tomography pattern of ILD at the time of inclusion**

|                                             | <b>RAILD<br/>(712)</b> |
|---------------------------------------------|------------------------|
| <b>With specified ILD subtype n (%)</b>     | 396 (55.6)             |
| Usual interstitial pneumonia, n (%)         | 116 (29.3)             |
| Non-specific interstitial pneumonia, n (%)  | 90 (22.7)              |
| Interstitial lymphocytic pneumonia, n (%)   | 12 (3)                 |
| Cryptogenic organizing pneumonia, n (%)     | 80 (20.2)              |
| Desquamative interstitial pneumonia, n (%)  | 6 (1.5)                |
| Acute interstitial pneumonia, n (%)         | 25 (6.3)               |
| Obliterans bronchiolitis, n (%)             | 61 (15.4)              |
| Emphysema-fibrosis syndrome, n (%)          | 6 (1.5)                |
| <b>Time from RA to ILD diagnosis, years</b> |                        |
| N (%)                                       | 492 (69.1)             |
| Mean (SD)                                   | 5.8 (9.4)#             |
| Median (Q1, Q3)                             | 1.9 (0.1, 6.9)         |

*ILD: Interstitial lung disease; RA: Rheumatoid arthritis. Data extracted and analyzed considering from the first EHR available to 2 months after the inclusion date.*

Supplementary Table 7. Frequency of comorbidities at the time of inclusion

|                                             | RA<br>(13958) | RAILD<br>(712) | RAnonILD<br>(13246) | p value | OR<br>(95% CI)    |
|---------------------------------------------|---------------|----------------|---------------------|---------|-------------------|
| <b>Hypertension, n (%)</b>                  | 5194 (37.2)   | 342 (48)       | 4852 (36.6)         | <0.001* | 1.60 (1.37, 1.87) |
| <b>Diabetes mellitus, n (%)</b>             | 2111 (15.1)   | 160 (22.5)     | 1951 (14.7)         | <0.001* | 1.68 (1.39, 2.02) |
| <b>Dyslipidemia, n (%)</b>                  | 6580 (47.1)   | 404 (56.7)     | 6176 (46.6)         | <0.001* | 1.50 (1.29, 1.75) |
| <b>Cardiovascular disease, n (%)</b>        | 2023 (14.5)   | 184 (25.8)     | 1839 (13.9)         | <0.001* | 2.16 (1.80, 2.58) |
| Atrial Fibrillation, n (%)                  | 952 (6.8)     | 79 (11.1)      | 873 (6.6)           | <0.001* | 1.77 (1.37, 2.26) |
| Heart failure, n (%)                        | 1198 (8.6)    | 128 (18)       | 1070 (8.1)          | <0.001* | 2.49 (2.02, 3.06) |
| Acute myocardial infarction, n (%)          | 290 (2.1)     | 19 (2.7)       | 271 (2)             | 0.278   | 1.31 (0.77, 2.11) |
| TIA, n (%)                                  | 184 (1.3)     | 10 (1.4)       | 174 (1.3)           | 0.737   | 1.07 (0.50, 2.03) |
| <b>Obesity, n (%)</b>                       | 877 (6.3)     | 65 (9.1)       | 812 (6.1)           | 0.002*  | 1.54 (1.16, 2.01) |
| <b>Fatty Liver, n (%)</b>                   | 455 (3.3)     | 35 (4.9)       | 420 (3.2)           | 0.016** | 1.58 (1.08, 2.25) |
| <b>Malignancy, n (%)</b>                    | 1243 (8.9)    | 113 (15.9)     | 1130 (8.5)          | <0.001* | 2.02 (1.62, 2.50) |
| <b>Infections, n (%)</b>                    | 2431 (17.4)   | 239 (33.6)     | 2192 (16.5)         | <0.001* | 2.55 (2.16, 3.00) |
| <b>Latent tuberculosis infection, n (%)</b> | 51 (0.4)      | 9 (1.3)        | 42 (0.3)            | <0.001* | 4.02 (1.72, 8.43) |
| <b>COPD, n (%)</b>                          | 718 (5.1)     | 93 (13.1)      | 625 (4.7)           | <0.001* | 3.03 (2.38, 3.84) |
| <b>Asthma, n (%)</b>                        | 844 (6)       | 69 (9.7)       | 775 (5.9)           | <0.001* | 1.73 (1.31, 2.24) |
| <b>Depression, n (%)</b>                    | 1036 (7.4)    | 68 (9.6)       | 968 (7.3)           | 0.033*+ | 1.34 (1.02, 1.74) |
| <b>Kidney failure, n (%)</b>                | 1260 (9)      | 109 (15.3)     | 1151 (8.7)          | <0.001* | 1.90 (1.52, 2.36) |
| <b>Inflammatory Bowel Disease, n (%)</b>    | 417 (3)       | 27 (3.8)       | 390 (2.9)           | 0.212   | 1.30 (0.84, 1.94) |
| <b>Crohn's Disease, n (%)</b>               | 147 (1.1)     | 14 (2)         | 133 (1)             | 0.022*  | 1.98 (1.05, 3.46) |
| <b>Ulcerative colitis, n (%)</b>            | 84 (0.6)      | 9 (1.3)        | 75 (0.6)            | 0.039*+ | 2.25 (0.99, 4.52) |
| <b>Psoriasis, n (%)</b>                     | 629 (4.5)     | 26 (3.7)       | 603 (4.6)           | 0.307   | 0.79 (0.51, 1.19) |
| <b>Reactive arthritis, n (%)</b>            | 40 (0.3)      | 1 (0.1)        | 39 (0.3)            | 0.722   | 0.48 (0.01, 2.82) |
| <b>Uveitis, n (%)</b>                       | 237 (1.7)     | 4 (0.6)        | 233 (1.8)           | 0.011*  | 0.32 (0.09, 0.82) |
| <b>Gout, n (%)</b>                          | 628 (4.5)     | 27 (3.8)       | 601 (4.5)           | 0.403   | 0.83 (0.54, 1.23) |
| <b>Hyperuricemia, n (%)</b>                 | 599 (4.3)     | 31 (4.4)       | 568 (4.3)           | 0.924   | 1.02 (0.68, 1.47) |
| <b>Hypertransaminasemia, n (%)</b>          | 202 (1.4)     | 13 (1.8)       | 189 (1.4)           | 0.336   | 1.28 (0.67, 2.27) |
| <b>Osteoporosis, n (%)</b>                  | 1711 (12.3)   | 134 (18.8)     | 1577 (11.9)         | <0.001* | 1.72 (1.40, 2.09) |
| <b>Bone fracture, n (%)</b>                 | 2319 (16.6)   | 150 (21.1)     | 2169 (16.4)         | <0.002* | 1.36 (1.12, 1.65) |

CI: Confidence interval; COPD: Chronic obstructive pulmonary disease; ILD: Interstitial lung disease; OR: Odds ratio (Fisher test); RA: Rheumatoid arthritis; SD: Standard deviation; TIA: Transient Ischemic Attack. Data extracted and analyzed considering a window of [-6, +2 months] around the inclusion date. \*Statistical differences were considered significant when  $p < 0.05$  in two-tailed test. +When correcting for multiple testing (adjusted p values),  $p > 0.05$ .

Supplementary Table 8. Blood tests at the time of inclusion

|                                            | RA<br>(13958)   | RAILD<br>(712)     | RAnonILD<br>(13246) | p value | Estimate <sup>1</sup> (95% CI)      |
|--------------------------------------------|-----------------|--------------------|---------------------|---------|-------------------------------------|
| <b>Hemoglobin, N (%)</b>                   | 7178 (51.4)     | 422 (59.3)         | 6756 (51)           |         |                                     |
| Mean (SD), g/dl                            | 13.8 (5.1)      | 13 (4.1)#          | 13.8 (5.1)          | <0.001* | -0.80 (-1.21, -0.39)                |
| Median (Q1, Q3), g/dl                      | 13 (11.6, 14.3) | 12.6 (11.1, 14)    | 13 (11.6, 14.3)     |         |                                     |
| Anemia <sup>†</sup> , n (%)                | 2780 (19.9)     | 205 (28.8)         | 2575 (19.4)         | <0.001* | 1.68 (1.41, 1.99) <sup>2</sup>      |
| <b>Platelets, N (%)</b>                    | 4458 (31.9)     | 271 (38.1)         | 4187 (31.6)         |         |                                     |
| Mean (SD), 1000/mm <sup>3</sup>            | 251.3 (118.1)#  | 247.5 (120)#       | 251.5 (117.9)#      | 0.248   | -7.00 (-20.00, 5.00) <sup>3</sup>   |
| Median (Q1, Q3), 1000/mm <sup>3</sup>      | 243 (187, 308)  | 238 (174.5, 314.5) | 243 (188, 307)      |         |                                     |
| Thrombocytopenia, n (%)                    | 482 (3.5)       | 39 (5.5)           | 443 (3.3)           | 0.004*  | 1.67 (1.16, 2.35)                   |
| Thrombocytosis, n (%)                      | 541 (3.9)       | 41 (5.8)           | 500 (3.8)           | 0.012*  | 1.56 (1.09, 2.17)                   |
| <b>HbA1c, N (%)</b>                        | 1057 (7.6)      | 97 (13.6)          | 960 (7.2)           |         |                                     |
| Mean (SD), %                               | 7.7 (6.2)#      | 7.6 (5.7)#         | 7.7 (6.2)#          | 0.296   | 0.10 (-0.10, 0.40)                  |
| Median (Q1, Q3), %                         | 6.1 (5.6, 7.2)  | 6.4 (5.7, 7.2)     | 6.1 (5.6, 7.2)      |         |                                     |
| <b>HDL, N (%)</b>                          | 1525 (10.9)     | 112 (15.7)         | 1413 (10.7)         |         |                                     |
| Mean (SD), mg/dl                           | 52.3 (20.9)#    | 47.4 (20)#         | 52.7 (21)#          | 0.004*  | -0.05 (-9.00, -2.00)                |
| Median (Q1, Q3), mg/dl                     | 51 (38, 64)     | 45 (35, 57.2)      | 51 (39, 64)         |         |                                     |
| <b>LDL, N (%)</b>                          | 2123 (15.2)     | 144 (20.2)         | 1979 (14.9)         |         |                                     |
| Mean (SD), mg/dl                           | 113.5 (42.3)#   | 109.6 (41.5)#      | 113.7 (42.4)#       | 0.204   | -4.00 (-11.00, 2.00)                |
| Median (Q1, Q3), mg/dl                     | 112 (84, 140)   | 107.5 (80, 132)    | 112 (84, 140)       |         |                                     |
| <b>Triglycerides, N (%)</b>                | 2973 (21.3)     | 223 (31.3)         | 2750 (20.8)         |         |                                     |
| Mean (SD), mg/dl                           | 135.7 (186.5)#  | 148.7 (114.5)#     | 134.7 (191.1)#      | <0.001* | 14.00 (6.00, 22.00)                 |
| Median (Q1, Q3), mg/dl                     | 110 (77, 163)   | 124 (93, 169)      | 109 (77, 163)       |         |                                     |
| <b>Albumin, N (%)</b>                      | 1477 (10.6)     | 156 (21.9)         | 1321 (10)           |         |                                     |
| Mean (SD), mg/dl                           | 5.8 (8.1)#      | 7.9 (10.8)#        | 5.6 (7.6)#          | 0.681   | 2.28 (0.52, 4.03)                   |
| Median (Q1, Q3), mg/dl                     | 3.8 (3.2, 4.2)  | 3.7 (3.2, 4.3)     | 3.8 (3.1, 4.2)      |         |                                     |
| <b>Total bilirubin, N (%)</b>              | 2778 (19.9)     | 185 (26)           | 2593 (19.6)         |         |                                     |
| Mean (SD), mg/dl                           | 1.2 (4.1)#      | 1 (3.4)#           | 1.2 (4.1)#          | 0.605   | 0.01 (-0.06, 0.03)                  |
| Median (Q1, Q3), mg/dl                     | 0.5 (0.3, 0.8)  | 0.4 (0.3, 0.7)     | 0.5 (0.3, 0.8)      |         |                                     |
| <b>Creatinine, N (%)</b>                   | 2648 (19)       | 209 (29.4)         | 2439 (18.4)         |         |                                     |
| Mean (SD), mg/dl                           | 1 (0.8)#        | 1 (0.9)#           | 1 (0.8)#            | 0.851   | 0.01 (-0.05, 0.03)                  |
| Median (Q1, Q3), mg/dl                     | 0.9 (0.7, 1.1)  | 0.9 (0.7, 1.1)     | 0.9 (0.7, 1)        |         |                                     |
| <b>GFR, N (%)</b>                          | 1373 (9.8)      | 94 (13.2)          | 1279 (9.7)          |         |                                     |
| Mean (SD), ml/min/1.73m <sup>2</sup>       | 64.8 (25.3)#    | 64.9 (25.3)#       | 64.8 (25.3)#        | 0.672   | 0.01 (-5.00, 3.00)                  |
| Median (Q1, Q3), ml/min/1.73m <sup>2</sup> | 63 (47, 88)     | 60 (49.2, 87.2)    | 63.7 (47, 88)       |         |                                     |
| <b>ALT, N (%)</b>                          | 5761 (41.3)     | 335 (47.1)         | 5426 (41)           |         |                                     |
| Mean (SD), u/l                             | 84.9 (562.5)    | 75.4 (379.1)#      | 85.5 (571.9)        | 0.646   | -10.18 (-53.66, 33.29) <sup>2</sup> |
| Median (Q1, Q3), u/l                       | 20 (13, 36)     | 19 (12, 34)        | 20 (13, 36)         |         |                                     |
| <b>AST, N (%)</b>                          | 4350 (31.2)     | 276 (38.8)         | 4074 (30.8)         |         |                                     |
| Mean (SD), u/l                             | 53 (388.3)#     | 56.3 (362.1)#      | 52.8 (390.1)#       | 0.219   | 1.00 (-1.00, 2.00)                  |

|                      | RA<br>(13958) | RAILD<br>(712) | RAnonILD<br>(13246) | p value | Estimate <sup>1</sup> (95% CI) |
|----------------------|---------------|----------------|---------------------|---------|--------------------------------|
| Median (Q1, Q3), u/l | 22 (17, 32)   | 23.5 (17, 35)  | 22 (17, 32)         |         |                                |
| <b>GGT, N (%)</b>    | 3365 (24.1)   | 260 (36.5)     | 3105 (23.4)         |         |                                |
| Mean (SD), u/l       | 72.9 (154.4)# | 104.1 (277.3)# | 70.3 (139.1)#       | 0.004   | 5.00 (2.00, 9.00)              |
| Median (Q1, Q3), u/l | 36 (19, 71)   | 42 (23, 86)    | 36 (19, 70)         |         |                                |

ACPA: Anticitrullinated protein antibody; ALT: Alanine aminotransferase; AST: Aspartate aminotransferase; CI: Confidence interval; CRP: C-reactive protein; ESR: Erythrocyte sedimentation rate; GFR: Glomerular filtration rate; GGT: gamma glutamyl transferase; ILD: Interstitial lung disease; HbA1c: Hemoglobin A1c; HDL: High density lipoprotein; LDL: Low density lipoprotein; RA: Rheumatoid arthritis; RF: Rheumatoid factor; SD: Standard deviation. Data extracted and analyzed considering a window of [-6, +2 months] around the inclusion date. If multiple values were detected in the time window, only the closest to index was retained. #Median (Q1, Q3) is preferred over mean (SD) for interpretation as the feature is non-normal. <sup>1</sup> Wilcoxon test (difference of location) was performed for comparing RAILD vs RAnonILD patients. <sup>2</sup> Odds ratio (Fisher test) <sup>3</sup> Welch t-test was performed for statistical analysis of ALT. \*Statistical differences were considered significant when  $p < 0.05$  in two-tailed tests. +When correcting for multiple testing (adjusted p values),  $p > 0.05$ .

Supplementary Table 9. Sensitivity analysis with RA-support population at the time of inclusion

|                                            | RA<br>(support)<br>(12538) | RAILD<br>(support)<br>(696) | RAnonILD<br>(support)<br>(11842) |
|--------------------------------------------|----------------------------|-----------------------------|----------------------------------|
| <b>General characteristics</b>             |                            |                             |                                  |
| <b>Sex n (%)</b>                           | 12538 (100)                | 696 (100)                   | 11842 (100)                      |
| Female n (%)                               | 9280 (74)                  | 432 (62.1)                  | 8848 (74.7)                      |
| Male n (%)                                 | 3258 (26)                  | 264 (37.9)                  | 2994 (25.3)                      |
| <b>Age, years</b>                          |                            |                             |                                  |
| N (%)                                      | 12538 (100)                | 696 (100)                   | 11842 (100)                      |
| Mean (SD)                                  | 60.8 (16.6)                | 64.9 (13.4)#                | 60.6 (16.7)                      |
| Median (Q1, Q3)                            | 62 (49, 74)                | 65 (57, 75)                 | 61 (49, 74)                      |
| <b>Tobacco n (%)</b>                       | 4171 (33.3)                | 332 (47.7)                  | 3839 (32.4)                      |
| Tobacco yes/ex* n (%)                      | 2457 (58.9)                | 218 (65.7)                  | 2239 (58.3)                      |
| Tobacco no* n (%)                          | 1714 (41.1)                | 114 (34.3)                  | 1600 (41.7)                      |
| <b>Alcohol n (%)</b>                       | 927 (7.4)                  | 46 (6.6)                    | 881 (7.4)                        |
| Alcohol yes/ex* n (%)                      | 285 (30.7)                 | 17 (37)                     | 268 (30.4)                       |
| Alcohol no* n (%)                          | 642 (69.3)                 | 29 (63)                     | 613 (69.6)                       |
| <b>Comorbidities</b>                       |                            |                             |                                  |
| <b>Hypertension n (%)</b>                  | 4720 (37.6)                | 335 (48.1)                  | 4385 (37)                        |
| <b>Diabetes mellitus n (%)</b>             | 1916 (15.3)                | 156 (22.4)                  | 1760 (14.9)                      |
| <b>Dyslipidemia n (%)</b>                  | 5944 (47.4)                | 395 (56.8)                  | 5549 (46.9)                      |
| <b>Cardiovascular disease n (%)</b>        | 1905 (15.2)                | 181 (26)                    | 1724 (14.6)                      |
| Atrial Fibrillation n (%)                  | 892 (7.1)                  | 77 (11.1)                   | 815 (6.9)                        |
| Heart failure n (%)                        | 1140 (9.1)                 | 128 (18.4)                  | 1012 (8.5)                       |
| Acute myocardial infarction n (%)          | 276 (2.2)                  | 18 (2.6)                    | 258 (2.2)                        |
| TIA n (%)                                  | 173 (1.4)                  | 10 (1.4)                    | 163 (1.4)                        |
| <b>Obesity n (%)</b>                       | 806 (6.4)                  | 65 (9.3)                    | 741 (6.3)                        |
| <b>Fatty Liver n (%)</b>                   | 409 (3.3)                  | 33 (4.7)                    | 376 (3.2)                        |
| <b>Malignancy n (%)</b>                    | 1163 (9.3)                 | 110 (15.8)                  | 1053 (8.9)                       |
| <b>Infections n (%)</b>                    | 2289 (18.3)                | 237 (34.1)                  | 2052 (17.3)                      |
| <b>Latent tuberculosis infection n (%)</b> | 49 (0.4)                   | 9 (1.3)                     | 40 (0.3)                         |
| <b>COPD n (%)</b>                          | 668 (5.3)                  | 93 (13.4)                   | 575 (4.9)                        |
| <b>Asthma n (%)</b>                        | 775 (6.2)                  | 66 (9.5)                    | 709 (6)                          |
| <b>Depression n (%)</b>                    | 940 (7.5)                  | 65 (9.3)                    | 875 (7.4)                        |
| <b>Kidney failure n (%)</b>                | 1184 (9.4)                 | 108 (15.5)                  | 1076 (9.1)                       |
| <b>Inflammatory Bowel Disease n (%)</b>    | 396 (3.2)                  | 26 (3.7)                    | 370 (3.1)                        |
| Crohn's Disease n (%)                      | 141 (1.1)                  | 14 (2)                      | 127 (1.1)                        |
| Ulcerative Colitis n (%)                   | 78 (0.6)                   | 9 (1.3)                     | 69 (0.6)                         |
| <b>Psoriasis n (%)</b>                     | 542 (4.3)                  | 26 (3.7)                    | 516 (4.4)                        |
| <b>Reactive arthritis n (%)</b>            | 35 (0.3)                   | 1 (0.1)                     | 34 (0.3)                         |
| <b>Uveitis n (%)</b>                       | 206 (1.6)                  | 3 (0.4)                     | 203 (1.7)                        |

|                                   | <b>RA<br/>(support<br/>(12538)</b> | <b>RAILD<br/>(support<br/>(696)</b> | <b>RAnonILD<br/>(support<br/>(11842)</b> |
|-----------------------------------|------------------------------------|-------------------------------------|------------------------------------------|
| <b>Gout n (%)</b>                 | 567 (4.5)                          | 27 (3.9)                            | 540 (4.6)                                |
| <b>Hyperuricemia n (%)</b>        | 545 (4.3)                          | 29 (4.2)                            | 516 (4.4)                                |
| <b>Hypertransaminasemia n (%)</b> | 183 (1.5)                          | 13 (1.9)                            | 170 (1.4)                                |
| <b>Osteoporosis n (%)</b>         | 1592 (12.7)                        | 132 (19)                            | 1460 (12.3)                              |
| <b>Bone fracture n (%)</b>        | 2155 (17.2)                        | 148 (21.3)                          | 2007 (16.9)                              |

ILD: Interstitial lung disease; RA: Rheumatoid arthritis. *The presence of each feature was analyzed at the time of inclusion with a window of [-6, 2] months. \*Percentages calculated considering patients with available data. (#) Median (Q1, Q3) is preferred over mean (SD) for interpretation as the feature is non-normal.*



**Supplementary Table 10. Supplementary analysis in patients treated with DMARDs or glucocorticoids.**

|                                                             | <b>RA<br/>(treated)<br/>(10315)</b> | <b>RAILD<br/>(treated)<br/>(651)</b> | <b>RAnonILD<br/>(treated)<br/>(9664)</b> |
|-------------------------------------------------------------|-------------------------------------|--------------------------------------|------------------------------------------|
| <b>Conventional synthetic (cs) DMARDs n (%)</b>             | 5381 (52.2)                         | 318 (48.8)                           | 5063 (52.4)                              |
| <b>Methotrexate n (%)</b>                                   | 4994 (48.4)                         | 271 (41.6)                           | 4723 (48.9)                              |
| <b>Leflunomide n (%)</b>                                    | 1014 (9.8)                          | 117 (18)                             | 897 (9.3)                                |
| <b>Sulfasalazine n (%)</b>                                  | 117 (1.1)                           | 13 (2)                               | 104 (1.1)                                |
| <b>Biological (b) DMARDs n (%)</b>                          | 2257 (21.9)                         | 194 (29.8)                           | 2063 (21.3)                              |
| <b>TNF inhibitors n (%)</b>                                 | 1853 (18)                           | 108 (16.6)                           | 1745 (18.1)                              |
| Adalimumab n (%)                                            | 766 (7.4)                           | 49 (7.5)                             | 717 (7.4)                                |
| Certolizumab pegol n (%)                                    | 179 (1.7)                           | 5 (0.8)                              | 174 (1.8)                                |
| Etanercept n (%)                                            | 890 (8.6)                           | 41 (6.3)                             | 849 (8.8)                                |
| Golimumab n (%)                                             | 178 (1.7)                           | 6 (0.9)                              | 172 (1.8)                                |
| Infliximab n (%)                                            | 251 (2.4)                           | 28 (4.3)                             | 223 (2.3)                                |
| <b>Other MoA n (%)</b>                                      | 647 (6.3)                           | 124 (19)                             | 523 (5.4)                                |
| Abatacept n (%)                                             | 347 (3.4)                           | 62 (9.5)                             | 285 (2.9)                                |
| Rituximab n (%)                                             | 332 (3.2)                           | 70 (10.8)                            | 262 (2.7)                                |
| Tocilizumab n (%)                                           | 386 (3.7)                           | 34 (5.2)                             | 352 (3.6)                                |
| <b>Targeted synthetic (ts) DMARDs, JAK inhibitors n (%)</b> | 76 (0.7)                            | 2 (0.3)                              | 74 (0.8)                                 |
| Tofacitinib n (%)                                           | 56 (0.5)                            | 2 (0.3)                              | 54 (0.6)                                 |
| Baricitinib n (%)                                           | 24 (0.2)                            | 0 (0)                                | 24 (0.2)                                 |
| Filgotinib n (%)                                            | 1 (0)                               | 0 (0)                                | 1 (0)                                    |
| Upadacitinib n (%)                                          | 1 (0)                               | 0 (0)                                | 1 (0)                                    |
| <b>Others</b>                                               |                                     |                                      |                                          |
| Cyclophosphamide n (%)                                      | 86 (0.8)                            | 28 (4.3)                             | 58 (0.6)                                 |
| Mycophenolate n (%)                                         | 113 (1.1)                           | 64 (9.8)                             | 49 (0.5)                                 |
| Azathioprine n (%)                                          | 184 (1.8)                           | 49 (7.5)                             | 135 (1.4)                                |
| <b>Glucocorticoids n (%)</b>                                | 2878 (27.9)                         | 377 (57.9)                           | 2501 (25.9)                              |

DMARD: Disease-modifying antirheumatic drug; ILD: Interstitial lung disease; JAK: Janus kinase; MoA: Mechanism of action; RA: Rheumatoid arthritis; TNF: Tumor necrosis factor. *The presence of each feature was analyzed between the time of inclusion and two years of follow-up.*

**Supplementary Table 11. Healthcare resource utilization during follow-up**

|                                        | RA<br>(13958)   | RAILD<br>(712)  | RAnonILD<br>(13246) | p value  | OR<br>(95% CI)       |
|----------------------------------------|-----------------|-----------------|---------------------|----------|----------------------|
| <b>Number of hospitalizations</b>      |                 |                 |                     |          |                      |
| N (%)                                  | 4473 (32)       | 442 (62.1)      | 4031 (30.4)         | <0.001** | 3.74 (3.19, 4.39)    |
| Mean (SD)                              | 25.6 (70.9)#    | 22.3 (58.3)#    | 25.9 (72.1)#        |          |                      |
| Median (Q1, Q3)                        | 2.8 (0.9, 10.7) | 4.3 (1.3, 15.7) | 2.7 (0.9, 10.2)     | <0.001** | 0.65 (0.32, 1.05)    |
| <b>Number of outpatient visits</b>     |                 |                 |                     |          |                      |
| N (%)                                  | 10731 (76.9)    | 617 (86.7)      | 10114 (76.4)        | <0.001** | 2.01 (1.61, 2.53)    |
| Mean (SD)                              | 7.4 (18.6)      | 9.1 (12.9)#     | 7.3 (18.9)          | 0.001**  | 1.76 (0.68, 2.84)    |
| Median (Q1, Q3)                        | 3.9 (1.7, 8)    | 6.3 (2.8, 11.4) | 3.8 (1.6, 7.8)      |          |                      |
| <b>Number of emergency room visits</b> |                 |                 |                     |          |                      |
| N (%)                                  | 6102 (43.7)     | 435 (61.1)      | 5667 (42.8)         | <0.001** | 2.10 (1.79, 2.46)    |
| Mean (SD)                              | 3.1 (16.8)      | 2.1 (3.2)#      | 3.2 (17.4)          | <0.001** | -1.09 (-1.64, -0.55) |
| Median (Q1, Q3)                        | 1 (0.5, 2)      | 1.1 (0.5, 2.3)  | 1 (0.5, 2)          |          |                      |

ILD: Interstitial lung disease; OR: Odds ratio (Fisher test); RA: Rheumatoid arthritis; SD: Standard deviation. *The presence of each feature was analyzed between the time of inclusion and the last follow-up. For numerical features, the occurrence count of each feature was analyzed and divided by follow-up years. (#) Median (Q1, Q3) is preferred over mean (SD) for interpretation as the feature is non-normal.*
